# Supplementary material for: Ligand Discovery for the Alanine-Serine-Cysteine Transporter (ASCT2, SLC1A5) from Homology Modeling and Virtual Screening
Source: PubMed Central journal article supplement (PMC4596572; doi:10.1371/journal.pcbi.1004477), 2015-10-07
Supplement: pcbi.1004477.s001.pdf [file pcbi.1004477.s001.pdf]

| Name                          | Sketch                                                                               |
|-------------------------------|--------------------------------------------------------------------------------------|
| Alanine (control)             |                                                                                      |
| <i>cis</i> -3-hydroxyproline  | 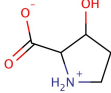   |
| Aminooxetanecarboxylate (AOC) |    |
| Penicillamine                 |    |
| Chloroalanine                 |    |
| Acivicin                      |   |
| L-DOPS                        |  |
| $\gamma$ -FBP                 |  |

**S1 Fig. 2D representation of the experimentally confirmed ligands**
